# Supplementary material for: On the transport properties of K 2 ZnV 2 O 7
Source: Royal Society of Chemistry journal article supplement (doi:10.1039/d5ta09854h), 2026-01-01
Supplement: d5ta09854h1.pdf [file d5ta09854h1.pdf]

## Supplementary Information

### On the Transport Properties of $\text{K}_2\text{ZnV}_2\text{O}_7$

Esther M. Curtis,<sup>a</sup> Kehan Kuang,<sup>b</sup> Josie E. Auckett,<sup>c,a</sup> Stephen J. Skinner<sup>b,d</sup> and Ivana Radosavljević Evans <sup>\*a</sup>

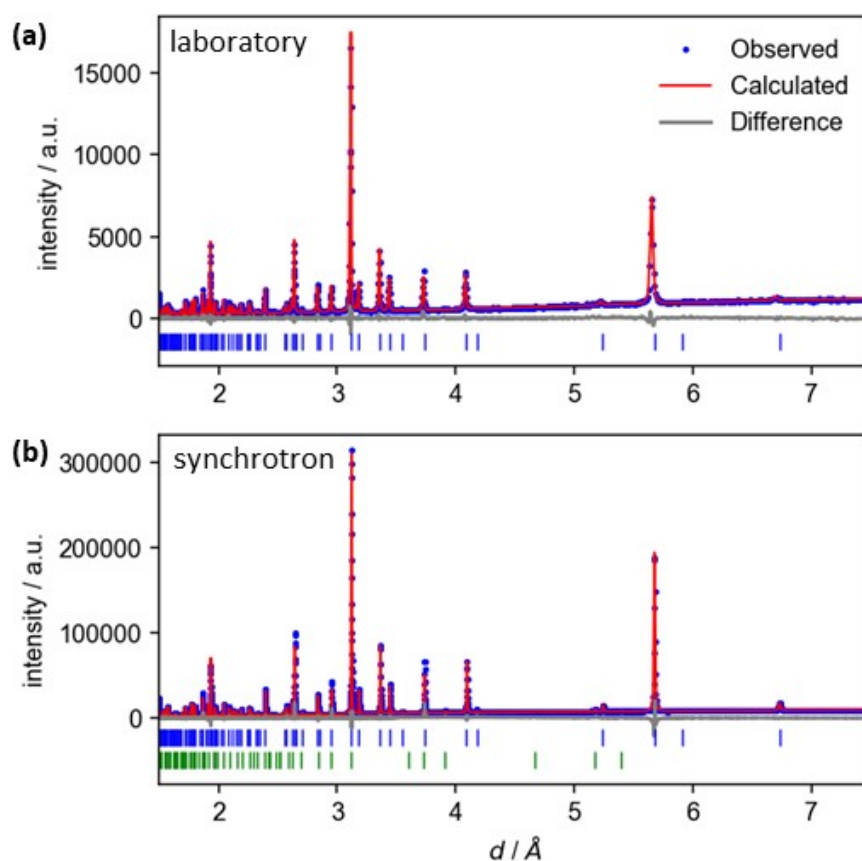

Figure S1: Rietveld fits of PXRD patterns of  $\text{K}_2\text{ZnV}_2\text{O}_7$  collected on the same sample using (a) laboratory X-rays and (b) synchrotron X-rays. The observed data are shown by blue dots, the calculated curve in red and the difference curve in grey.

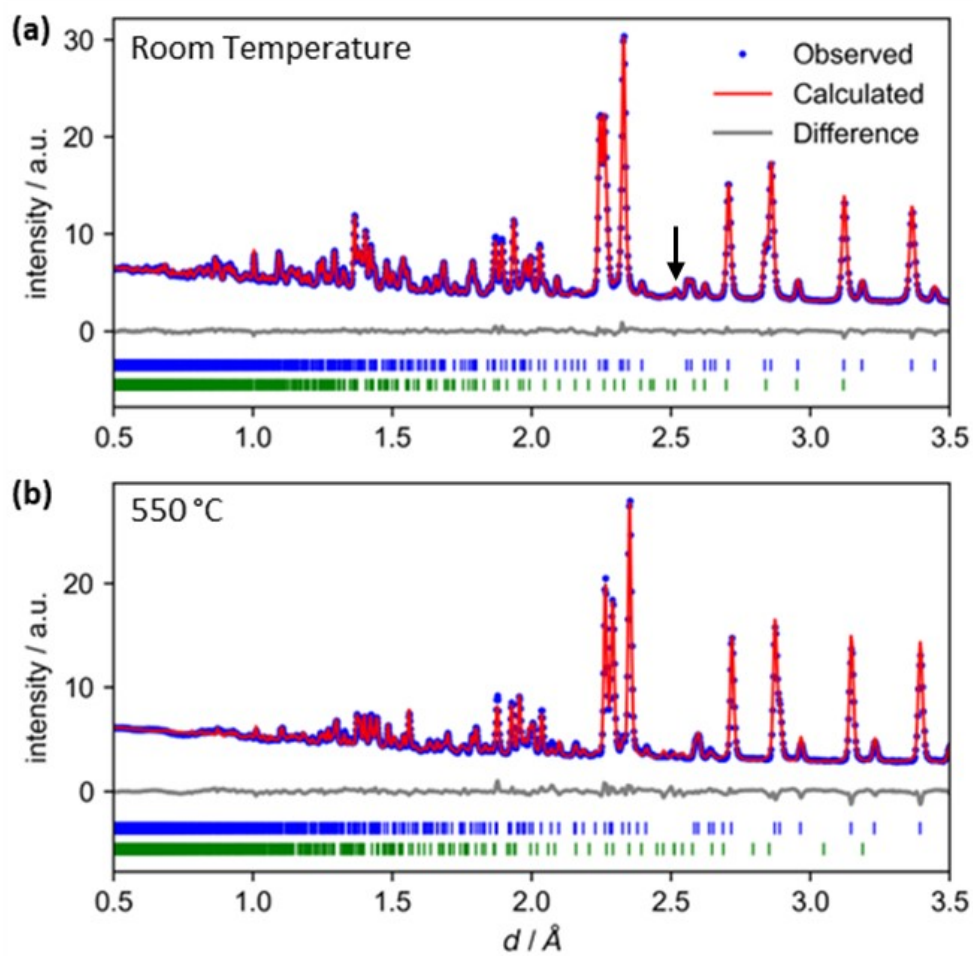

Figure S2: Rietveld fits to the powder neutron diffraction data (a) at room temperature,  $R_{\text{wp}} = 1.59\%$ ,  $\text{GoF} = 1.35$ ; (b) at 550°C,  $R_{\text{wp}} = 1.92\%$ ,  $\text{GoF} = 1.60$ . The black arrow marks the  $\text{KVO}_3$  peak at  $d \approx 2.5 \text{ \AA}$ .

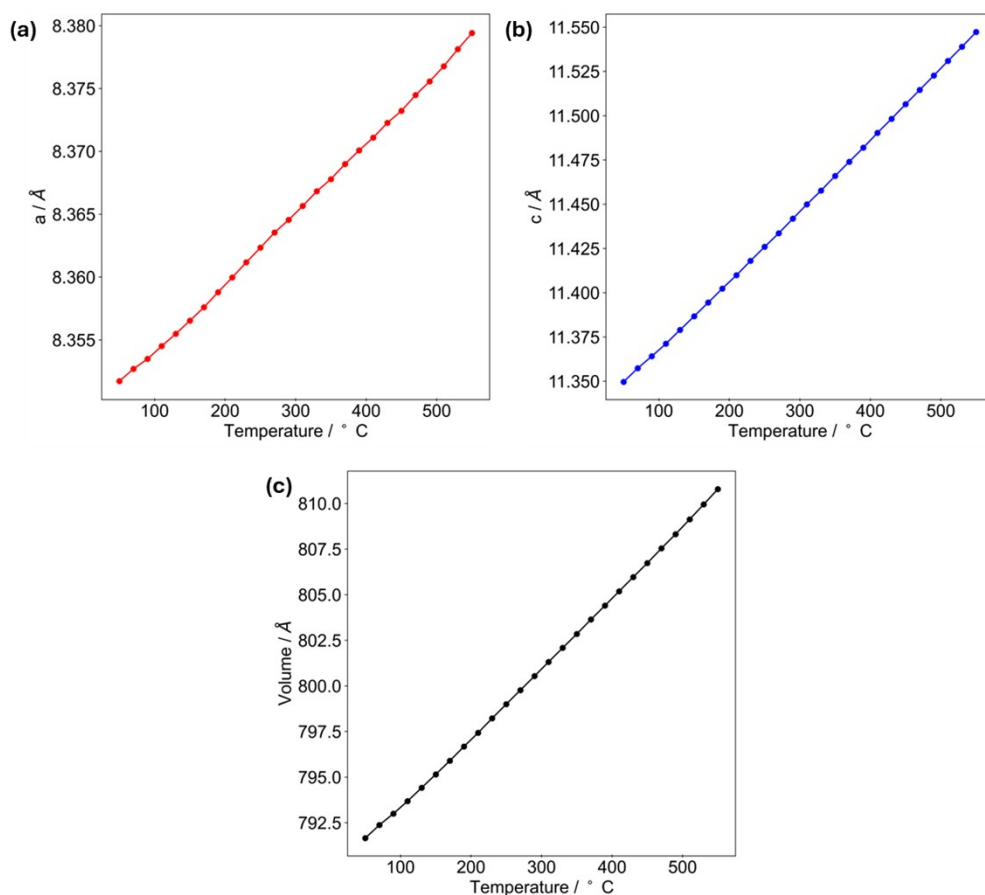

Figure S3: The unit cell parameters of  $\text{K}_2\text{ZnV}_2\text{O}_7$  on heating extracted from sequential Rietveld refinement of  $\text{K}_2\text{ZnV}_2\text{O}_7$  from variable temperature time of flight neutron power diffraction data collected at Polaris, ISIS. (a) the unit cell parameter  $a$ , (b) the unit cell parameter  $c$ , (c) the volume of the unit cell. The error bars are smaller than the data points.

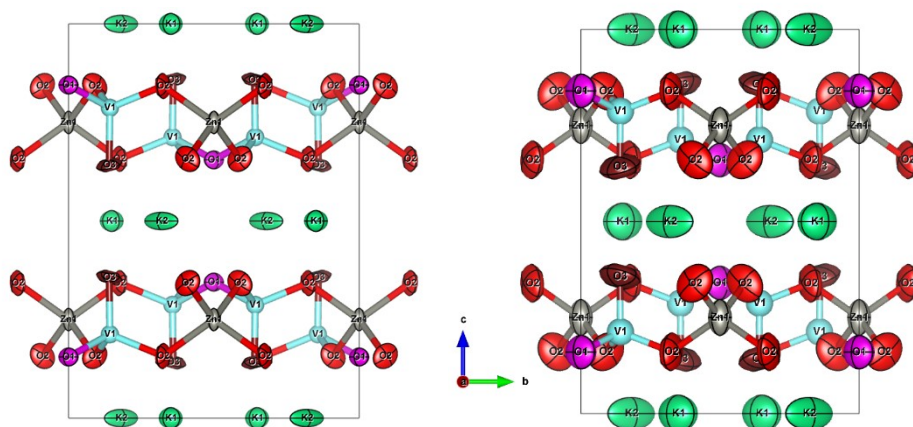

Figure S4: The structure of  $\text{K}_2\text{ZnV}_2\text{O}_7$  with anisotropic atomic displacement parameters (ADPs) determined from neutron diffraction data at room temperature (left) and at 550°C (right).

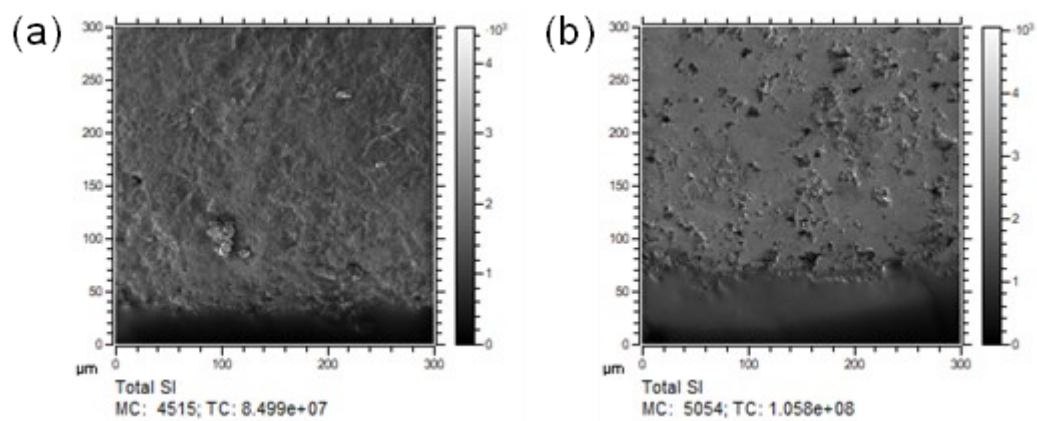

Figure S5: Total secondary ion images of (a) bare and (b) Ag-coated samples, respectively. An amorphous layer is observed in (b).
